# Supplementary material
Source: publisher figshare collection journal article supplement (https://springernature.figshare.com/ndownloader/files/17784785)
Supplement: Supplementary file 1 [file 17784785]

Measurement(s),Guided ultrasound waves in a composite plate under temperature variations • temperature
Technology Type(s),Piezoelectric transducers • Temperature Sensor Device
Factor Type(s),excitation frequency • temperature
